# Supplementary material
Source: publisher site journal article supplement (https://www.dovepress.com/article/426193)
Supplement: Supplementary file 1 [file get_supplementary_file.php]

Supplementary File 1 – Scatter plots of Oceanic Boundlessness (OBN) and Dread of Ego Dissolution (DED) by neuroticism

| | 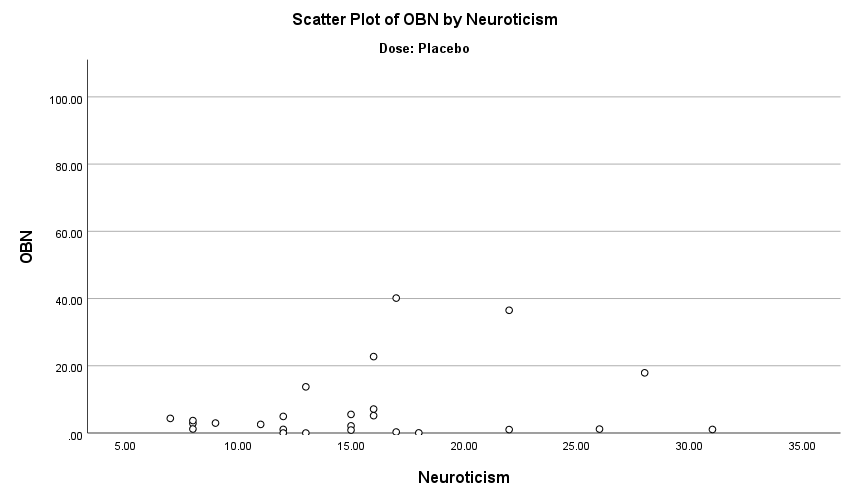 | 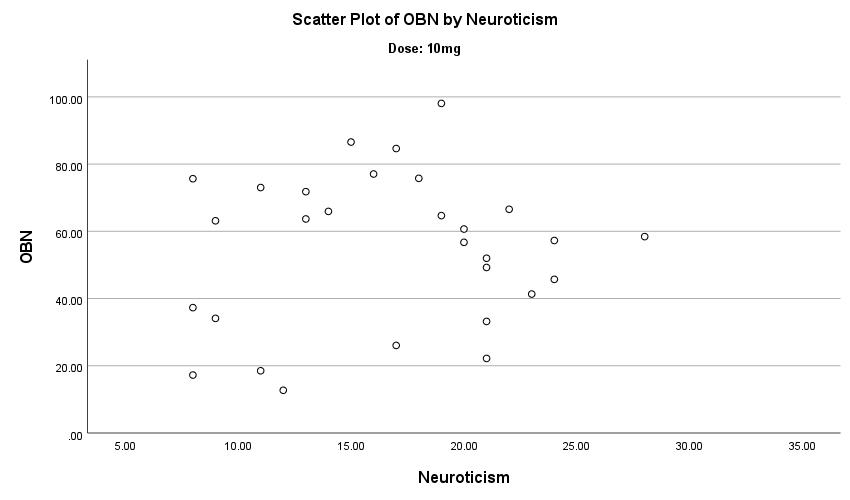 | 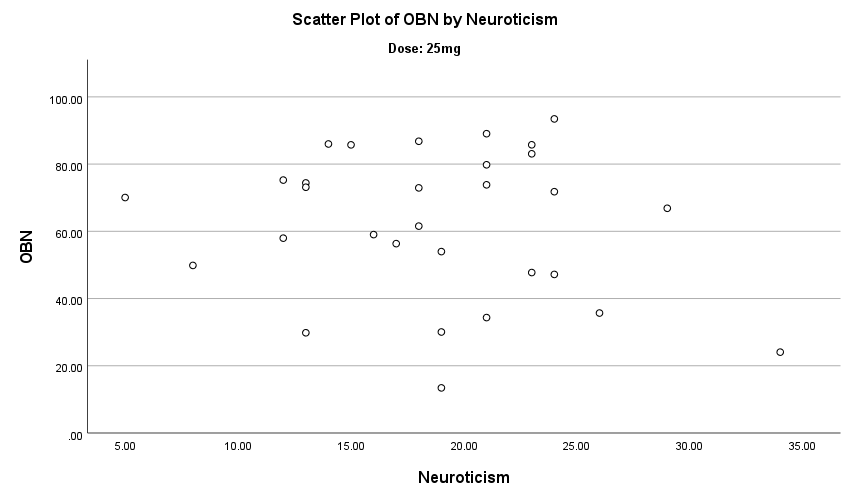 | | --- | --- | --- | |  |  |  | | 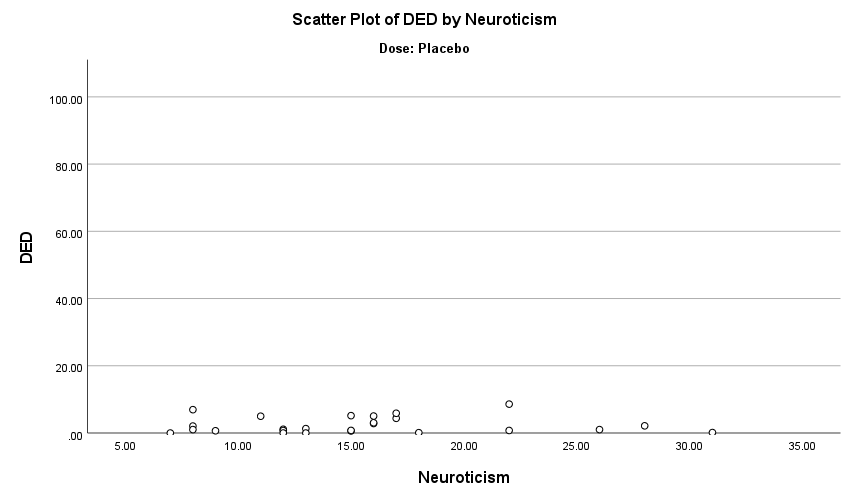 | 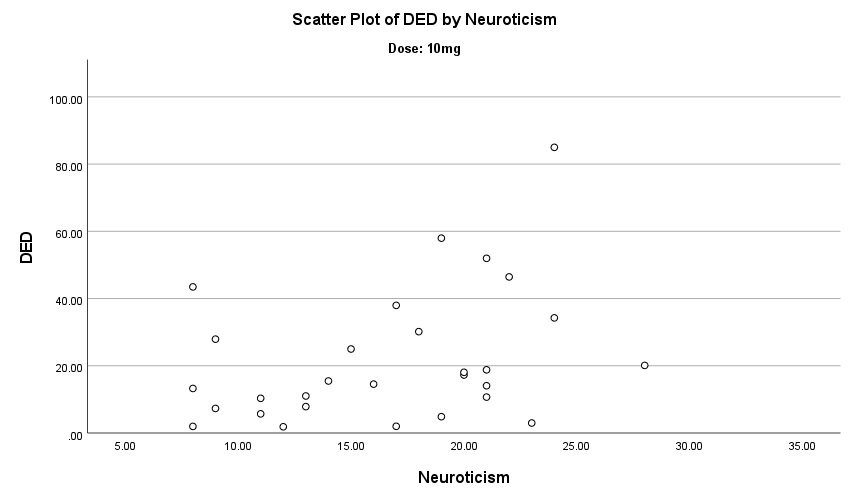 | 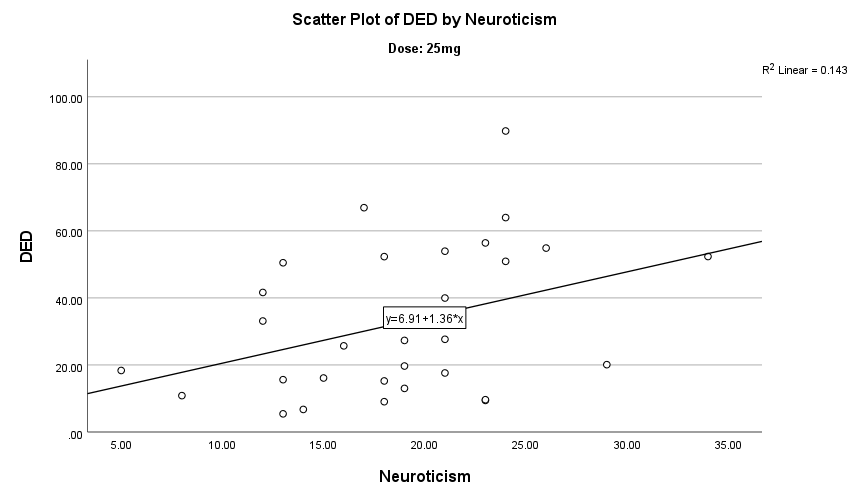  *r* = .38, *p* < .039 | |  |  |
| --- | --- | --- | --- | --- | --- | --- | --- | --- | --- | --- | --- |
|  |  |  |
|  |  |  |

Supplementary File 2 – Scatter plots of Oceanic Boundlessness (OBN) and Dread of Ego Dissolution (DED) by openness

| 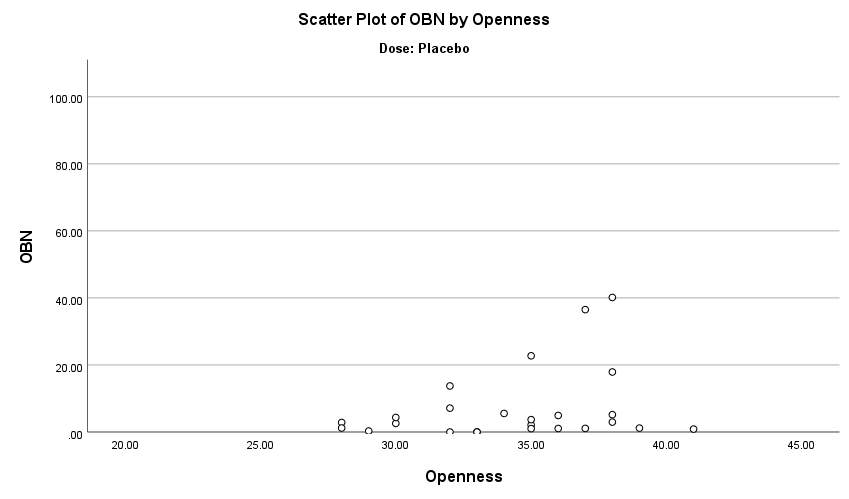 | 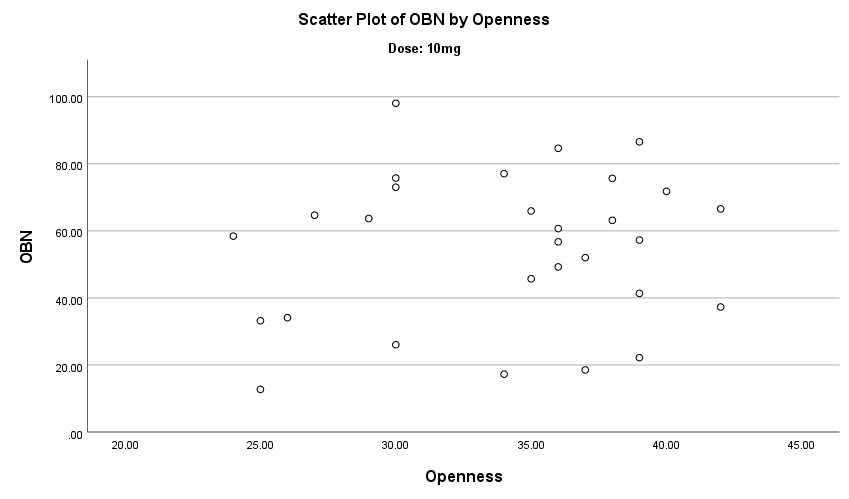 | 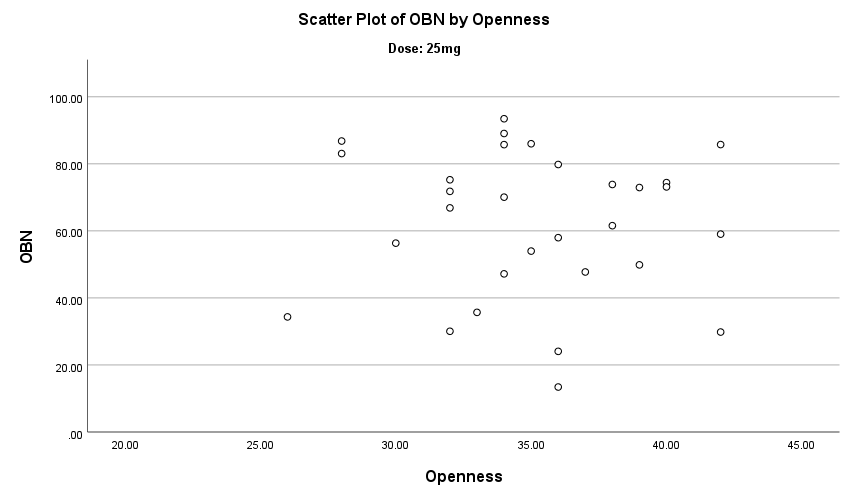 |
| --- | --- | --- |
|  |  |  |
| 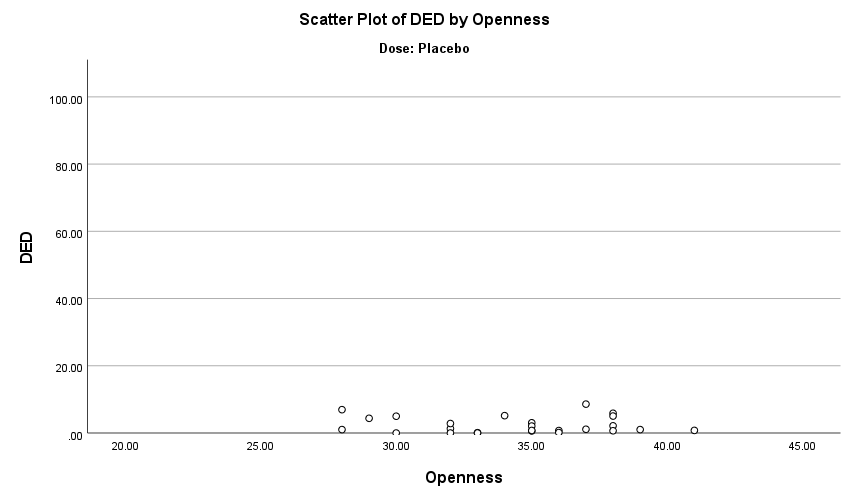 | 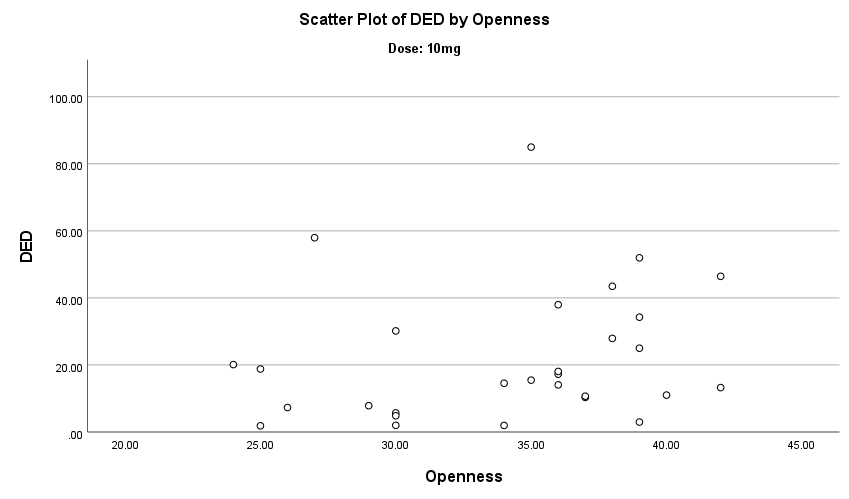 | 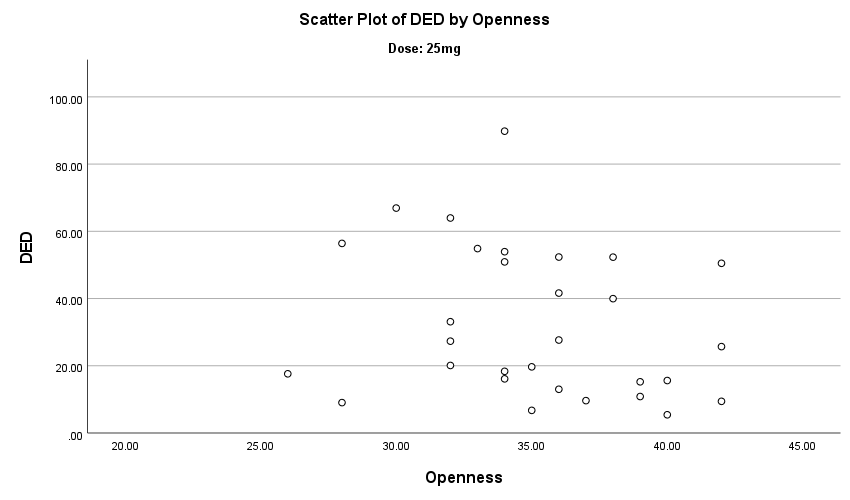 |

Supplementary File 3 – Scatter plots of Oceanic Boundlessness (OBN) and Dread of Ego Dissolution (DED) by agreeableness

| 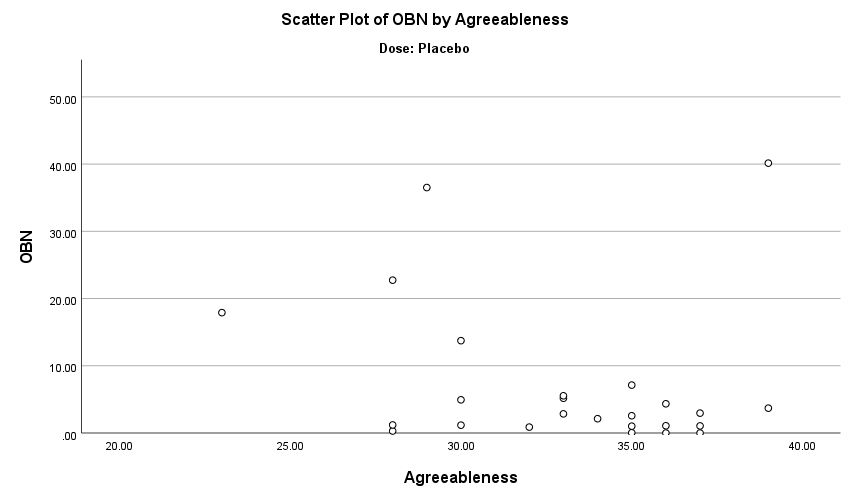 | 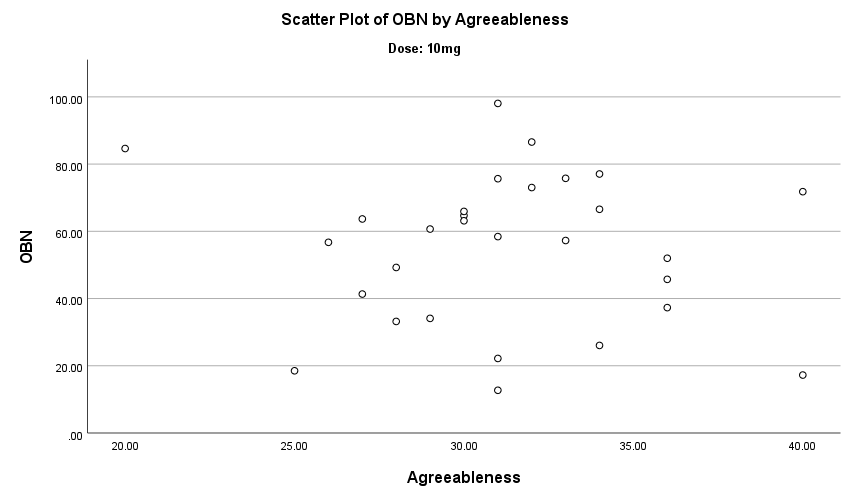 | 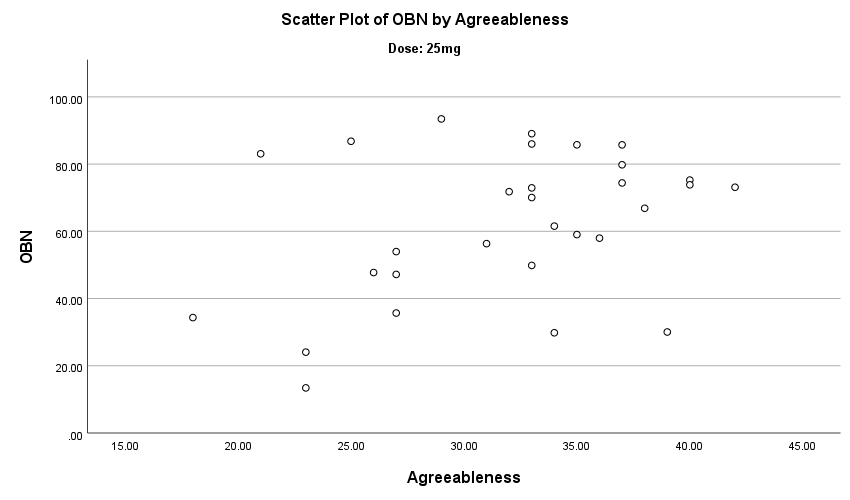 |
| --- | --- | --- |
|  |  |  |
| 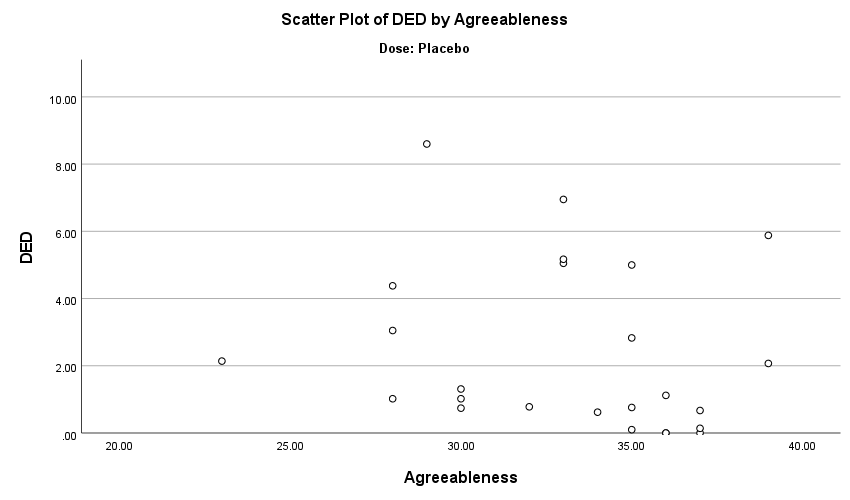 | 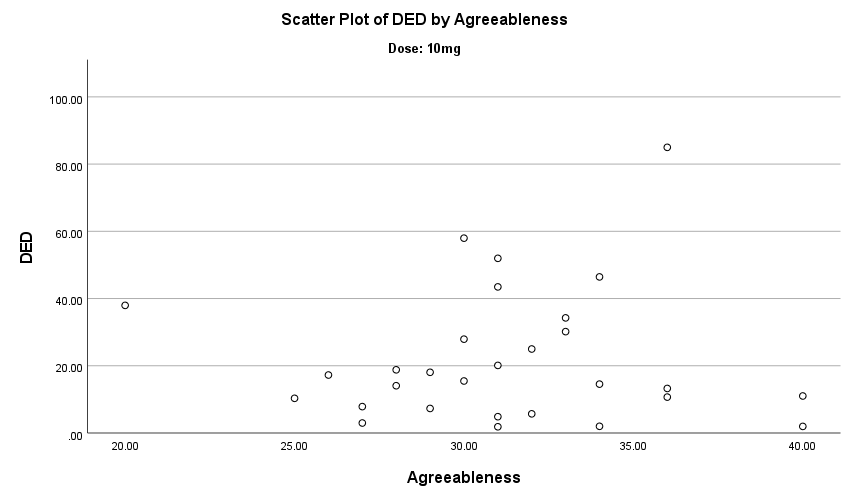 | 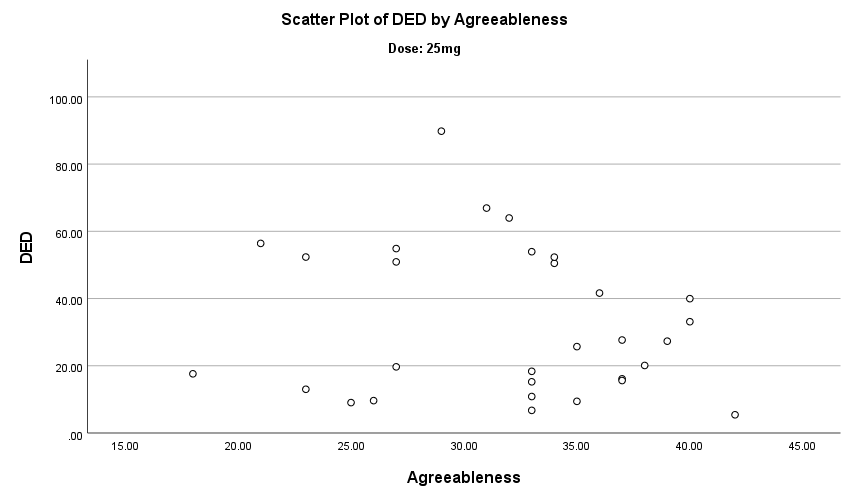 |

Supplementary File 4 – Scatter plots of Oceanic Boundlessness (OBN) and Dread of Ego Dissolution (DED) by extraversion

| 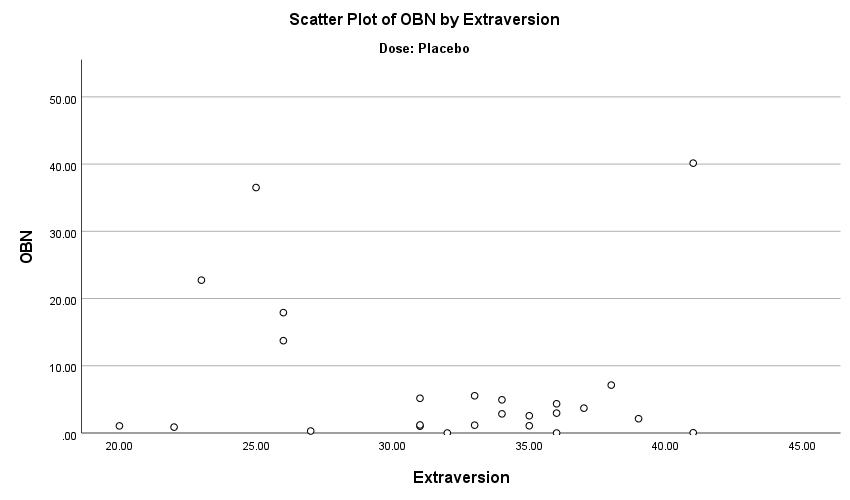 | 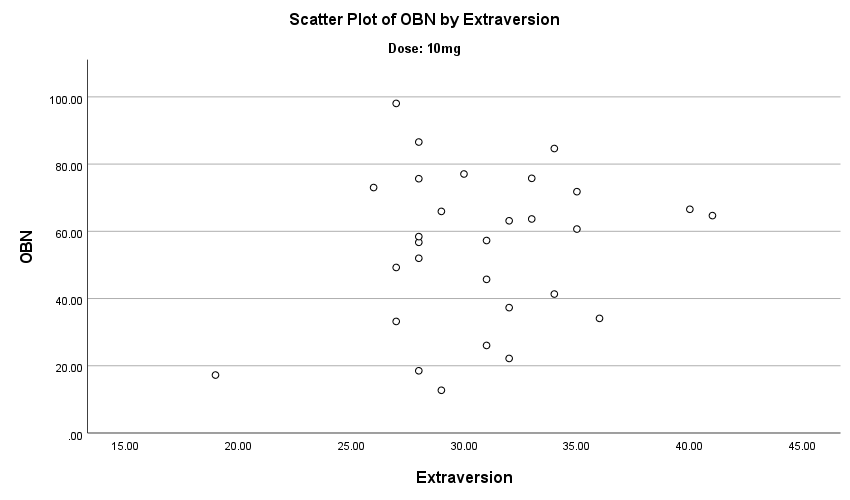 | 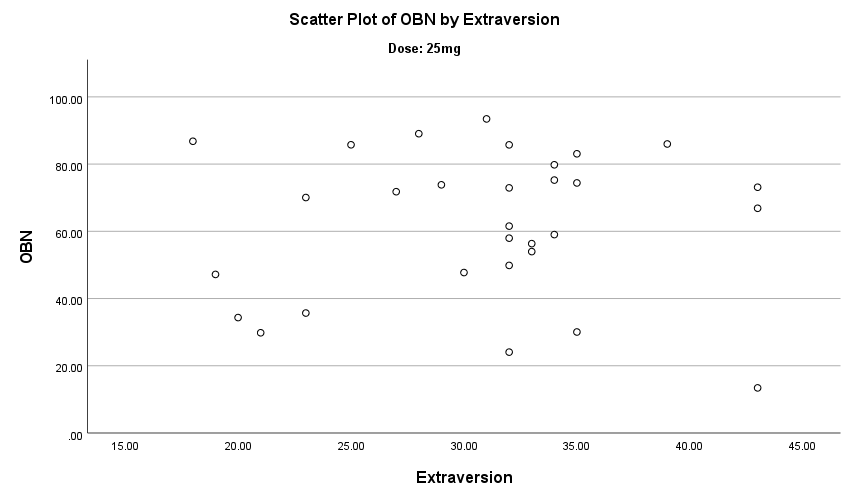 |
| --- | --- | --- |
|  |  |  |
| 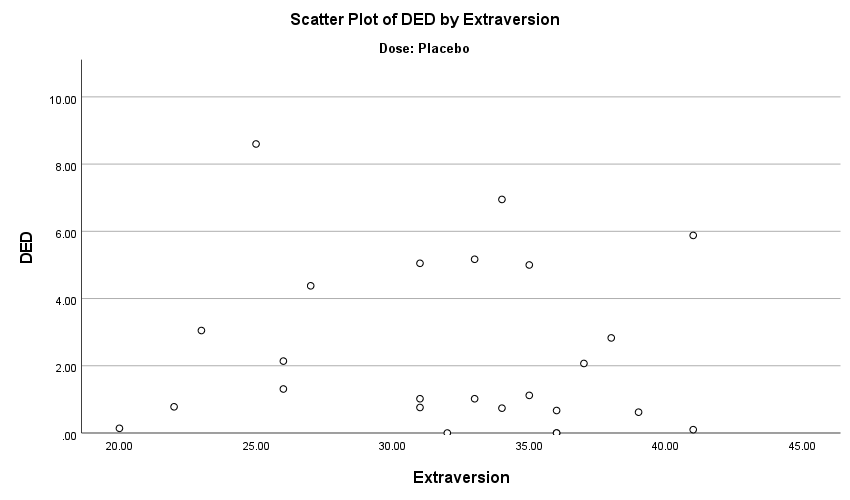 | 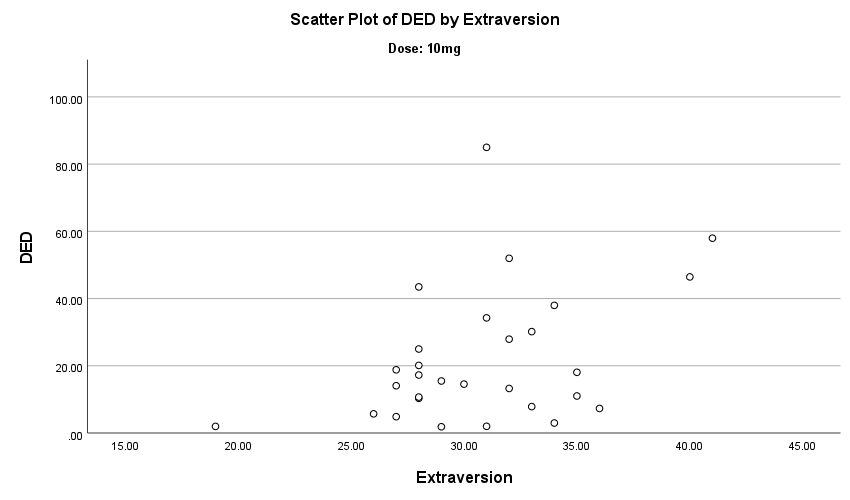 | 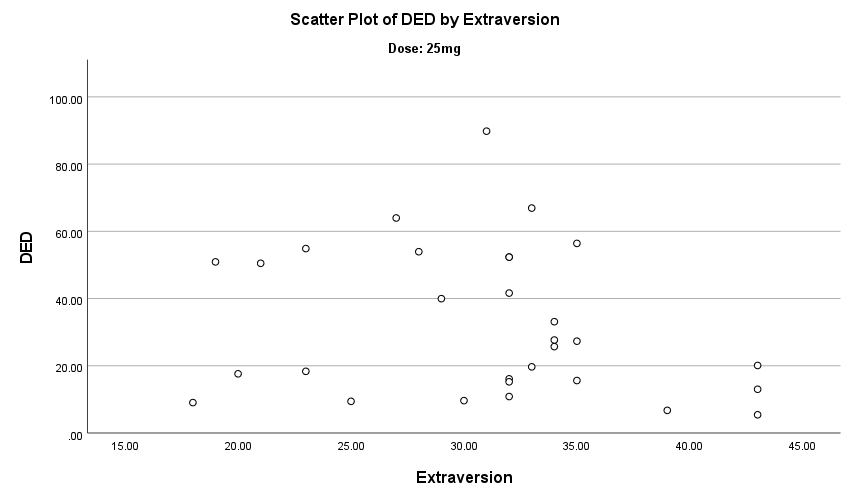 |

Supplementary File 5 – Scatter plots of Oceanic Boundlessness (OBN) and Dread of Ego Dissolution (DED) by conscientiousness

| 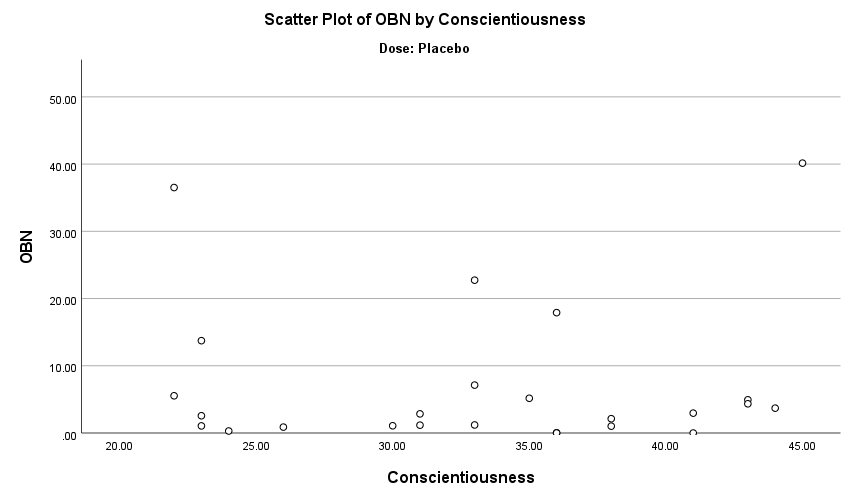 | 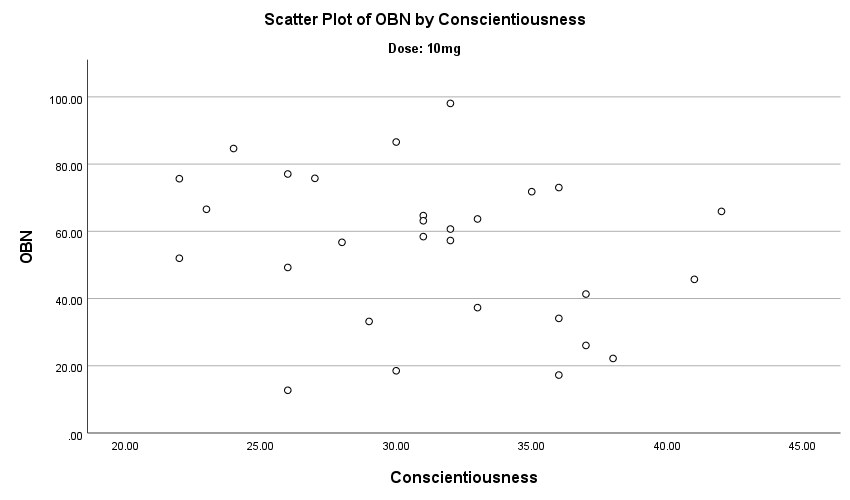 | 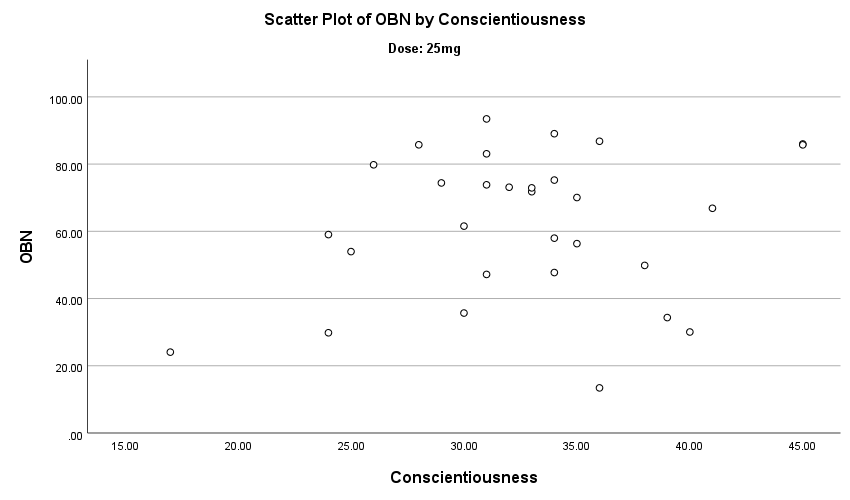 |
| --- | --- | --- |
|  |  |  |
| 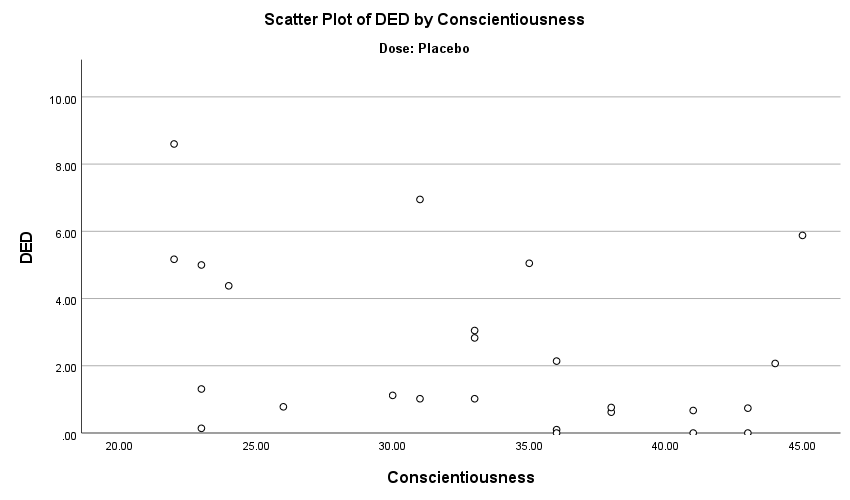 | 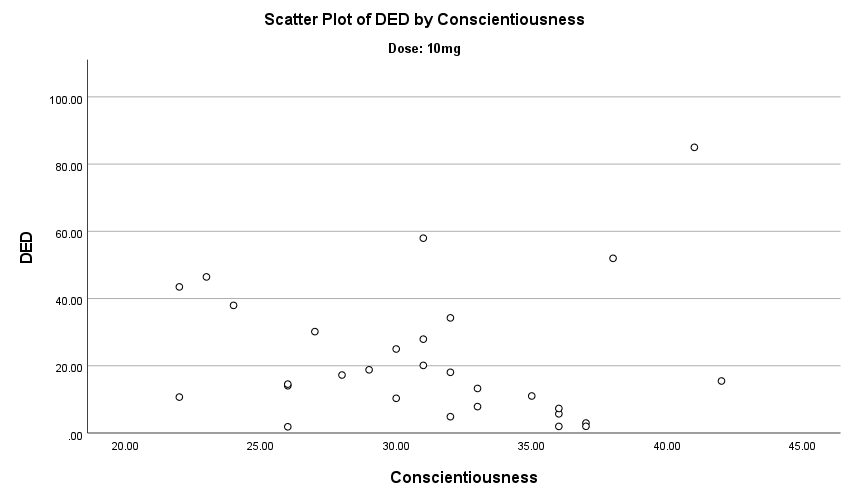 | 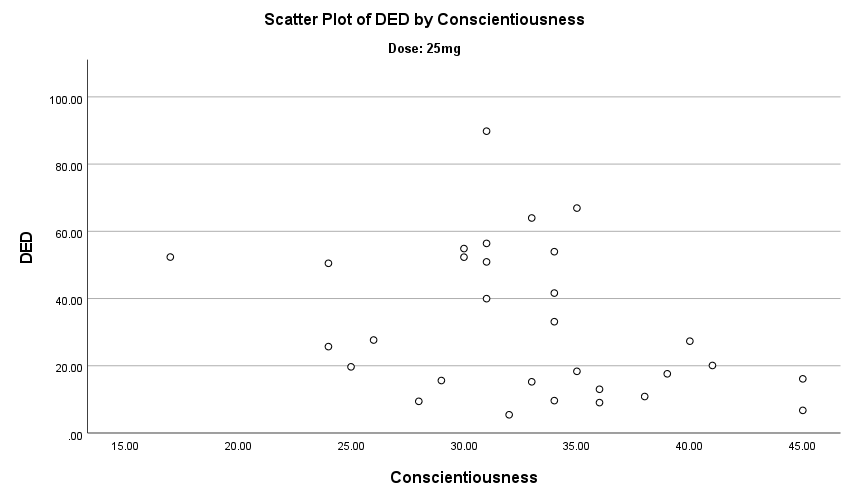 |

Supplementary File 6 – Scatter plots of Oceanic Boundlessness (OBN) and Dread of Ego Dissolution (DED) by positive affect

| 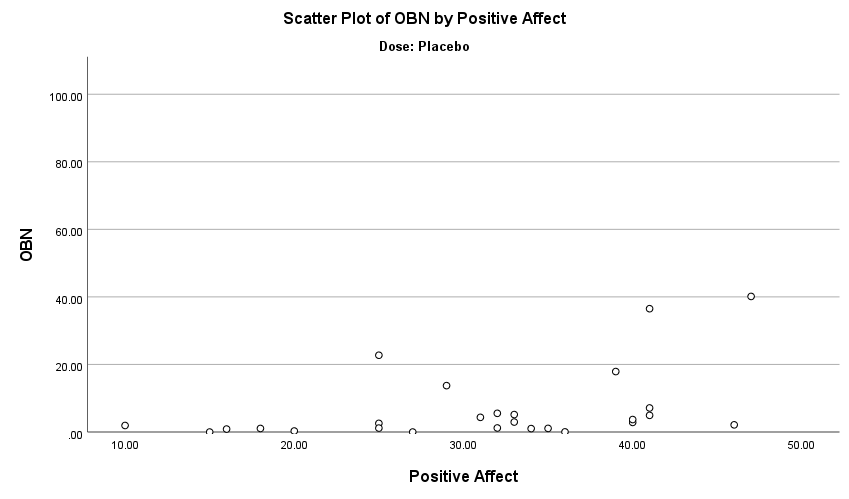 | 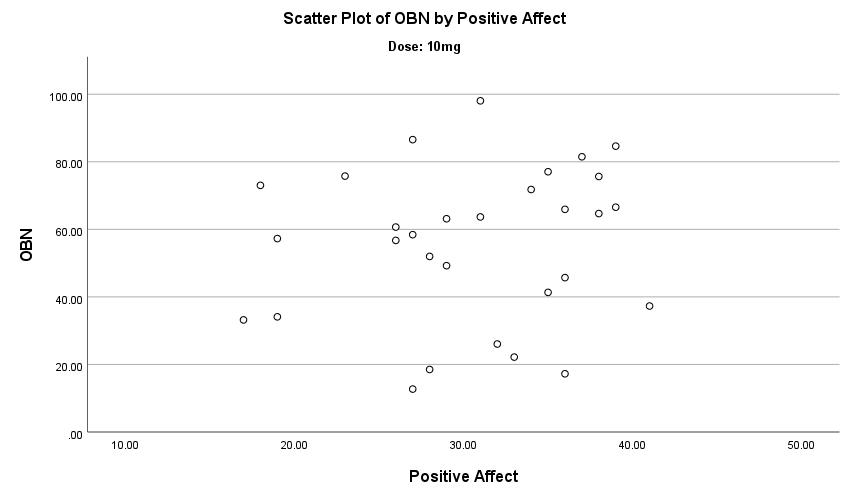 | 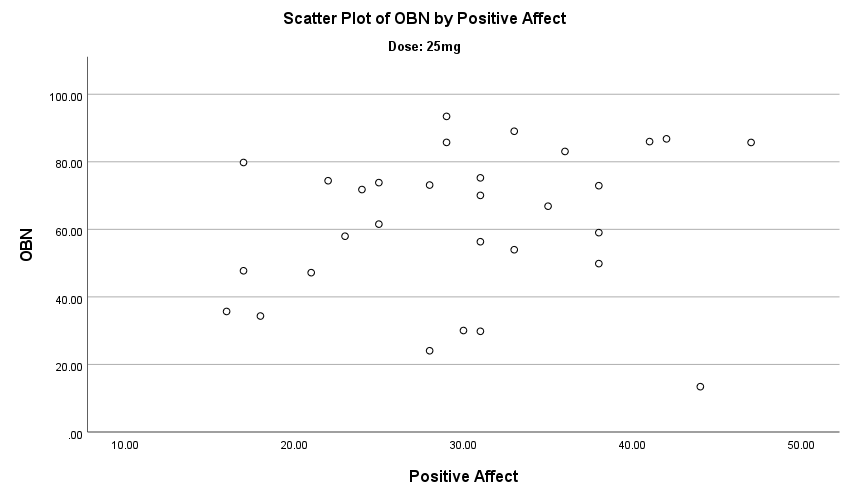 |
| --- | --- | --- |
|  |  |  |
| 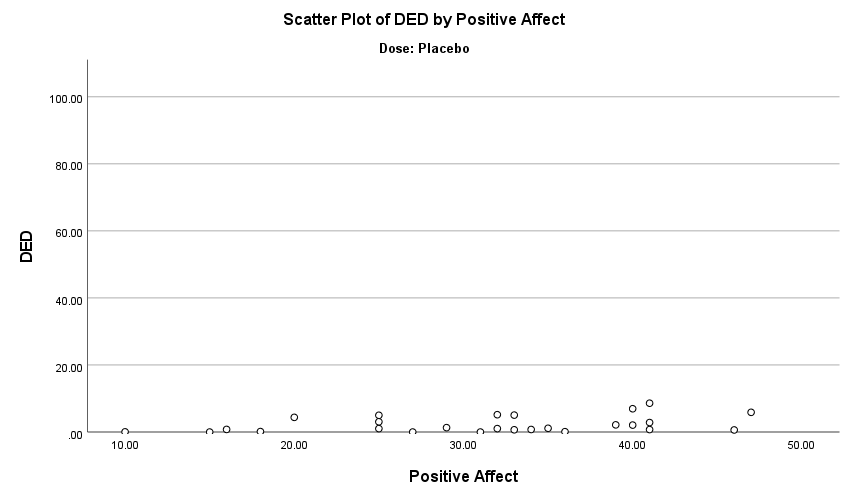 | 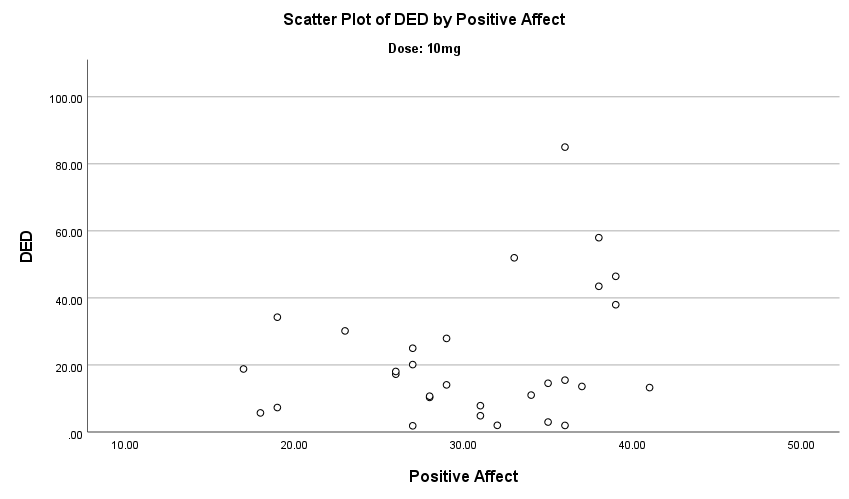 | 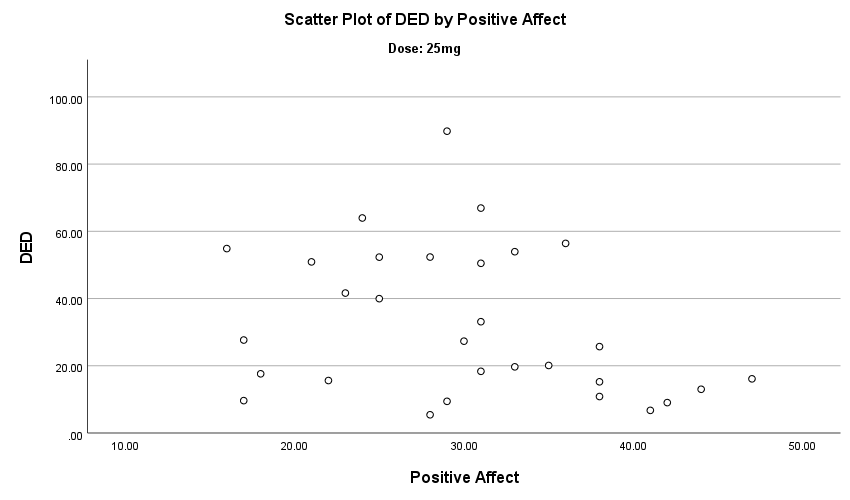 |

Supplementary File 7 – Scatter plots of Oceanic Boundlessness (OBN) and Dread of Ego Dissolution (DED) by negative affect

| 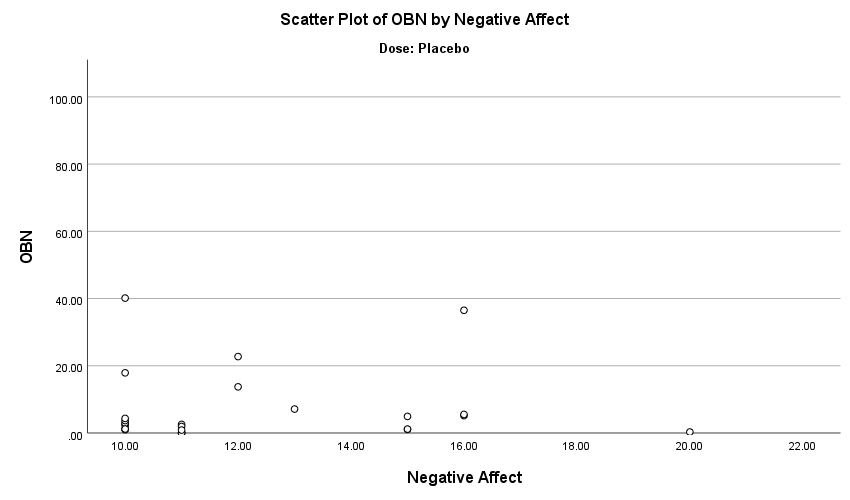 | 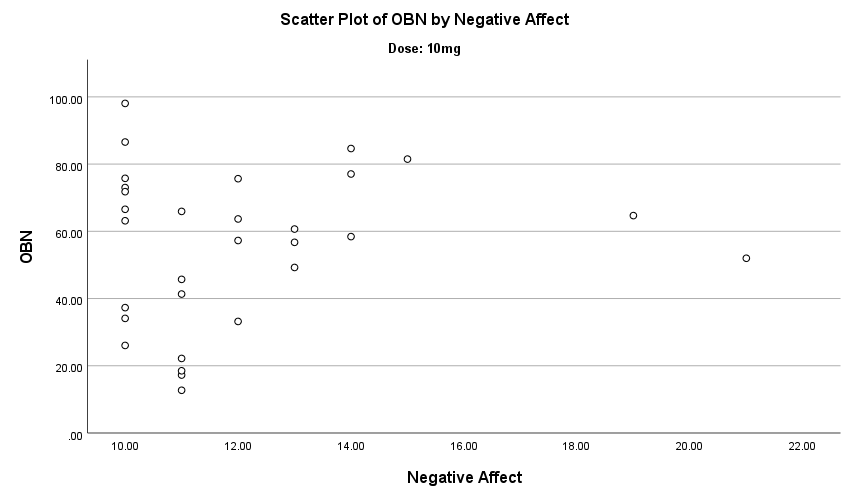 | 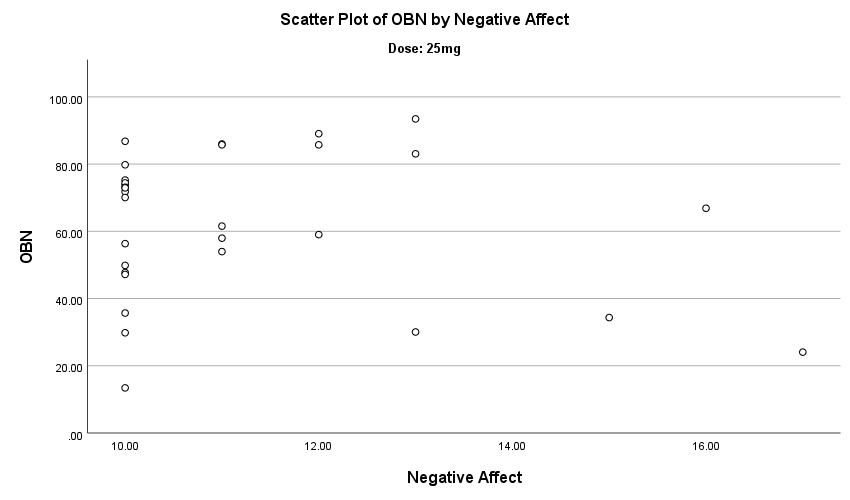 |
| --- | --- | --- |
|  |  |  |
| 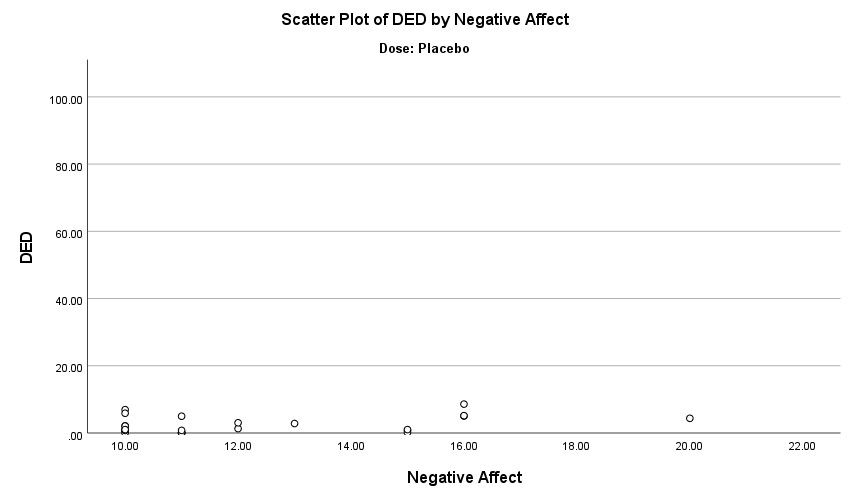 | 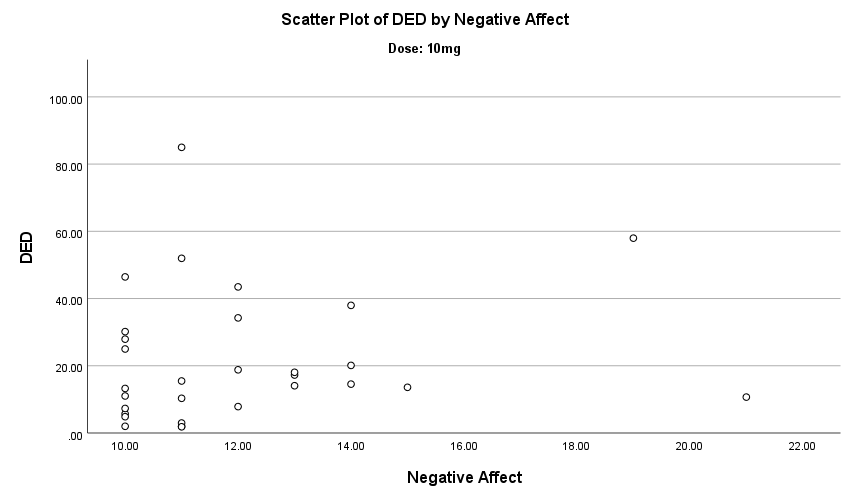 | 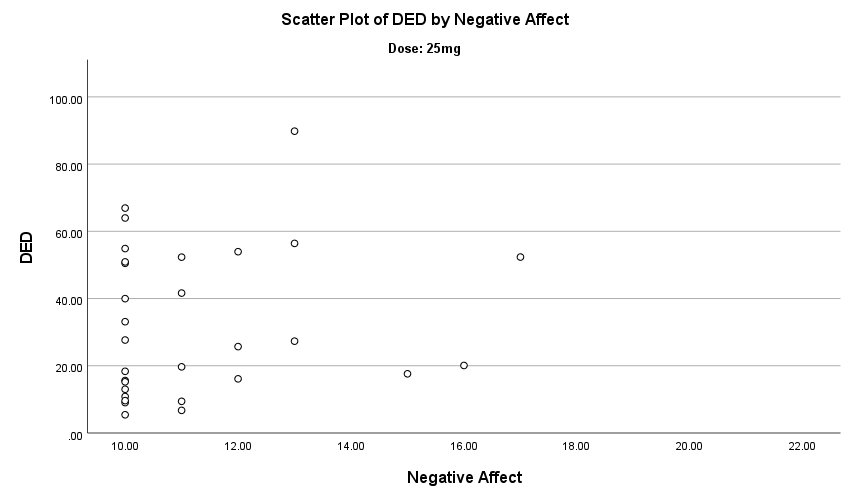 |
